# Supplementary material
Source: MDPI journal article supplement (https://www.mdpi.com/1996-1073/14/9/2576)
Supplement: s1 [file s1]

**Table S2.** Representative plants for heat production from wood biomass in Southern Italy.

| Region   | Province      | City/Town               | Capacity (kW) |
|----------|---------------|-------------------------|---------------|
| Abruzzo  | Chieti        | Ripa Teatina            | 300           |
| Abruzzo  | Teramo        | Sant’Omero              | 150           |
| Apulia   | Foggia        | Troia                   | 277           |
| Apulia   | Brindisi      | Fasano                  | 180           |
| Calabria | Vibo Valentia | Spadola                 | 99            |
| Campania | Salerno       | Oliveto Citra           | 98.1 (x7)     |
| Molise   | Campobasso    | San Martino in Pensilis | 98.1          |
| Sardinia | Nuoro         | Orgosolo                | 151           |
| Sardinia | Nuoro         | Orgosolo                | 108           |
