# Supplementary material
Source: MDPI journal article supplement (https://www.mdpi.com/1996-1073/14/9/2576)
Supplement: s1 [file s1]

**Table S1.** Plants for electricity production from solid biomass in Southern Italy.

| Region       | Province           | City/Town             | Nominal Power (kW) |
|--------------|--------------------|-----------------------|--------------------|
| Abruzzo      | Chieti             | Treglio               | 999                |
| Abruzzo      | Chieti             | Monteodorisio         | 999                |
| Abruzzo      | Chieti             | Ortona                | 844                |
| Abruzzo      | Teramo             | Ancarano              | 503                |
| Abruzzo      | Teramo             | Nereto                | 100                |
| Abruzzo      | Teramo             | Teraom                | 49                 |
| Abruzzo      | Teramo             | Castellalto           | 45                 |
| Abruzzo      | Teramo             | Sant'Omero            | 45                 |
| <b>TOTAL</b> |                    |                       | <b>3,584</b>       |
| Apulia       | Foggia             | Sant'Agata Di Puglia  | 25,200             |
| Apulia       | Foggia             | Foggia                | 12,950             |
| Apulia       | Bari               | Monopoli              | 12,000             |
| Apulia       | Bari               | Modugno               | 500                |
| Apulia       | Brindisi           | Torre Santa Susanna   | 200                |
| Apulia       | Brindisi           | Mesagne               | 135                |
| Apulia       | Bari               | Terlizzi              | 100                |
| Apulia       | Bari               | Bitonto               | 90                 |
| Apulia       | Taranto            | Mottola               | 49                 |
| <b>TOTAL</b> |                    |                       | <b>51,224</b>      |
| Basilicata   | Potenza            | Melfi                 | 999                |
| Basilicata   | Potenza            | Sant'Angelo Le Fratte | 999                |
| Basilicata   | Potenza            | Venosa                | 990                |
| Basilicata   | Matera             | -                     | 700                |
| Basilicata   | Matera             | Bernalda              | 500                |
| <b>TOTAL</b> |                    |                       | <b>4,188</b>       |
| Calabria     | Cosenza            | Laino Borgo           | 75,000             |
| Calabria     | Crotone            | Strongoli             | 51,000             |
| Calabria     | Crotone            | Crotone               | 32,200             |
| Calabria     | Cosenza            | Rende                 | 17,100             |
| Calabria     | Crotone            | Cutro                 | 16,500             |
| Calabria     | Reggio di Calabria | Taurianova            | 999                |
| Calabria     | Vibo Valentia      | Serra San Bruno       | 999                |
| Calabria     | Cosenza            | Parenti               | 998                |
| Calabria     | Catanzaro          | Catanzaro             | 100                |
| Calabria     | Catanzaro          | Catanzaro             | 100                |
| <b>TOTAL</b> |                    |                       | <b>194,996</b>     |
| Campania     | Napoli             | Casalnuovo di Napoli  | 2,774              |
| <b>TOTAL</b> |                    |                       | <b>2,774</b>       |
| Molise       | Campobasso         | Termoli               | 14,500             |
| Molise       | Campobasso         | Montenero Di Bisaccia | 999                |
| Molise       | Campobasso         | Molise                | 20                 |
| <b>TOTAL</b> |                    |                       | <b>15,519</b>      |
| Sardinia     | Cagliari           | Assemini              | 22,800             |
| Sardinia     | Sud Sardegna       | Serramanna            | 13,140             |

| <b>TOTAL</b> |           |                        | <b>35,940</b> |
|--------------|-----------|------------------------|---------------|
| Sicily       | Enna      | Enna                   | 20460         |
| Sicily       | Agrigento | Agrigento              | 9800          |
| Sicily       | Catania   | Caltagirone            | 999           |
| Sicily       | Messina   | Torrenova              | 200           |
| Sicily       | Siracusa  | Noto                   | 200           |
| Sicily       | Siracusa  | Noto                   | 199           |
| Sicily       | Agrigento | Naro                   | 199           |
| Sicily       | Agrigento | Racalmuto              | 195           |
| Sicily       | Ragusa    | Acate                  | 175           |
| Sicily       | Siracusa  | Carlentini             | 100           |
| Sicily       | Palermo   | Castelluzzo Di Sicilia | 50            |
| Sicily       | Messina   | Patti                  | 49            |
| Sicily       | Enna      | Piazza Armerina        | 20            |
| <b>TOTAL</b> |           |                        | <b>32,646</b> |
